# Supplementary material for: Monitoring the crystal orientation of black-arsenic via vibrational spectra
Source: Royal Society of Chemistry journal article supplement (doi:10.1039/c8tc05167d), 2018-12-19
Supplement: c8tc05167d1.pdf [file c8tc05167d1.pdf]

## Supplementary Information

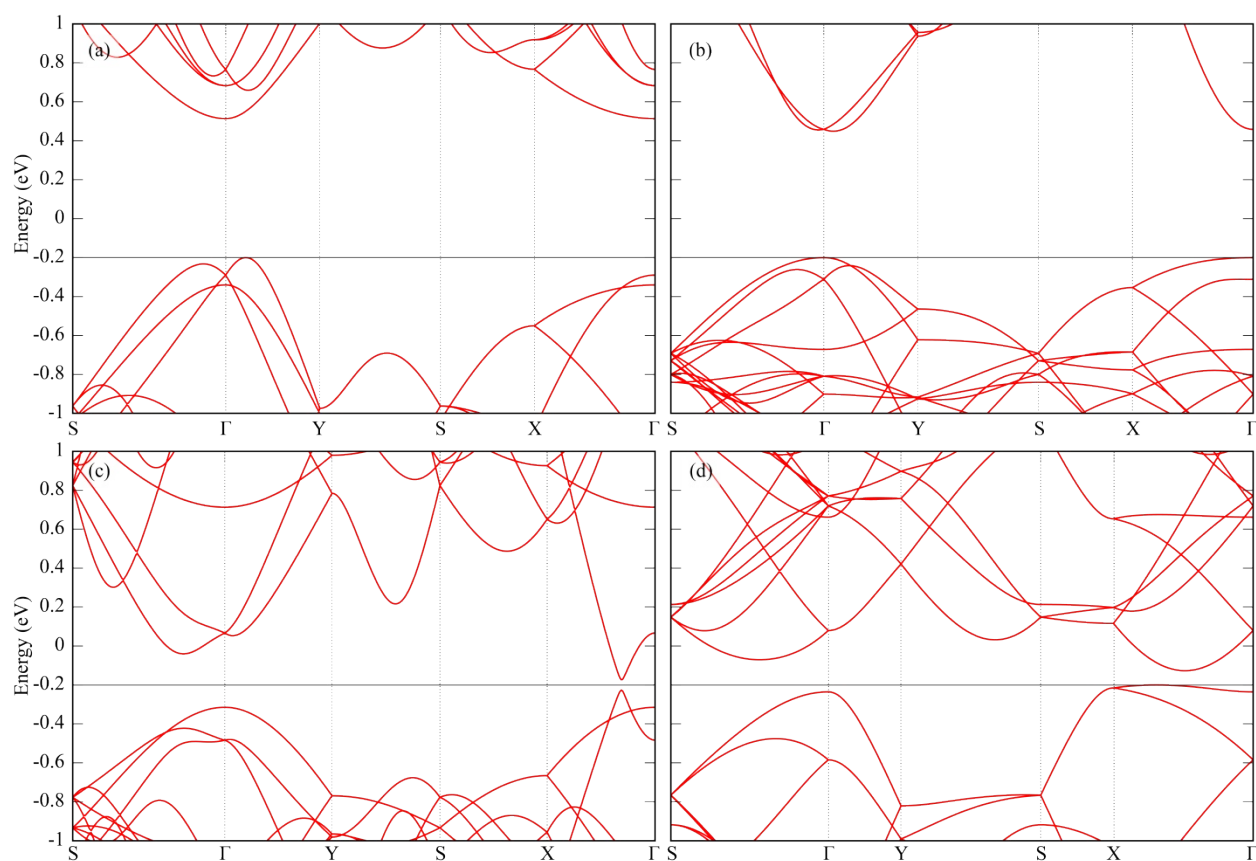

**Figure 1** Electronic band dispersions for (a) pristine b-As, (b) 9 % biaxially strained b-As, (c) 12 % and (d) 45 % uniaxially strained b-As along zigzag and armchair directions, respectively. 3x3 supercell was used for calculation of electronic band structures.
